# Supplementary material
Source: HighWire-hosted journal article supplement (https://erj.ersjournals.com/content/57/6/2003406)
Supplement: inline-supplementary-material-1 [file inline-supplementary-material-1.pdf]

**Supplementary Table S1:**

**Summary of examples of interventional and observational studies evaluating clinical epigenetics in pulmonary diseases**

| Epigenetic player                      | Conditions             | Sample size/type of study       | Aim                                                                                                                                                                                              | Phase/Status      | ID                             |
|----------------------------------------|------------------------|---------------------------------|--------------------------------------------------------------------------------------------------------------------------------------------------------------------------------------------------|-------------------|--------------------------------|
| <b>Observational</b>                   |                        |                                 |                                                                                                                                                                                                  |                   |                                |
| DNA methylation                        | Asthma                 | 200 participants, Case-control  | To evaluate DNA methylation patterns in PBMCs isolated from the persistent asthmatics and non-atopic healthy controls                                                                            | NA/Completed      | NCT01382836 [26]               |
| miRNAs                                 | COPD                   | 195 participants, Case-control  | To evaluate the role of miRNAs as diagnostic biomarkers in COPD patients                                                                                                                         | NA/Completed      | NCT02633280 [27]               |
| miRNA                                  | COPD                   | 739 participants, Case-control  | To evaluate miRNA derived from nasal epithelial cells, leukocytes and sputum with clinical outcomes in COPD, smokers, ex-smokers vs never smoking                                                | NA/Completed      | NCT01780298 [28]               |
| <b>Interventional</b>                  |                        |                                 |                                                                                                                                                                                                  |                   |                                |
| miRNAs                                 | Pulmonary hypertension | 22 patients, Randomized         | To evaluate baseline levels of miRNAs from patients with and without right ventricular dysfunction                                                                                               | Phase 4/Completed | NCT01839110 [29]               |
| DNA methylation, miRNAs                | Asthma                 | 40 participants, Non-Randomized | To compare the efficacy of different treatments in ex-smokers and smokers with asthma by measuring miRNA expression and DNA methylation in nasal brushings                                       | Phase 4/Completed | NCT01741285                    |
| DNA methylation, miRNAs                | COPD                   | 316 participants, Randomized    | To investigate the effectiveness of triple therapy (ICS/LABA/LAMA) in COPD patients by evaluating DNA methylation and miRNAs                                                                     | Phase 4/Ongoing   | EudraCT Number: 2019-003351-11 |
| DNA methylation, histone modifications | COPD                   | 20 participants, Randomized     | To analyze the effect of Foster inhalation on histone acetylation and DNA methylation in COPD patients                                                                                           | Phase 4/Completed | EudraCT Number: 2012-000155-14 |
| DNA methylation, miRNAs                | Asthma                 | 40 participants, Randomized     | To compare the efficacy of extra-fine particle HFA-QVAR to HFA-beclomethasone and HFA-fluticasone in ex-smokers and smokers with asthma by evaluating DNA methylation and miRNAs                 | Phase 4/Ongoing   | EudraCT Number: 2012-005350-39 |
| DNA methylation, miRNAs                | COPD                   | 260 participants, Randomized    | To investigate whether it is possible to better predict a favorable treatment response to ICS/LABA combination treatment in patients with COPD by analyzing DNA methylation and miRNA expression | Phase 3/Ongoing   | EudraCT Number: 2014-001563-12 |
| DNA methylation, miRNAs                | COPD                   | 88 participants, Randomized     | To study whether vanciclovir is safe in COPD patients by measuring DNA methylation and miRNAs                                                                                                    | Phase 2/Ongoing   | EudraCT Number: 2017-004686-28 |

*Abbreviations:* COPD: Chronic Obstructive Pulmonary Disease; LDCT: Low-Dose Computed Tomography; MiRNAs: Micro-RNAs; NA: Not Available; PAH: Pulmonary Arterial Hypertension; PBMCs: Peripheral Blood Mononuclear Cells.
