# Supplementary material
Source: HighWire-hosted journal article supplement (https://erj.ersjournals.com/content/57/6/2003406)
Supplement: inline-supplementary-material-3 [file inline-supplementary-material-3.pdf]

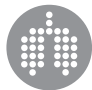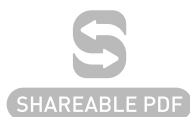

# Epigenetics and pulmonary diseases in the horizon of precision medicine: a review

Giuditta Benincasa<sup>1</sup>, Dawn L. DeMeo<sup>2</sup>, Kimberly Glass<sup>2</sup>, Edwin K. Silverman<sup>2</sup> and Claudio Napoli <sup>1,3</sup>

**Affiliations:** <sup>1</sup>Dept of Advanced Medical and Surgical Sciences (DAMSS), University of Campania “Luigi Vanvitelli”, Naples, Italy. <sup>2</sup>Channing Division of Network Medicine and the Division of Pulmonary and Critical Care Medicine, Dept of Medicine, Brigham and Women’s Hospital, Harvard Medical School, Boston, MA, USA. <sup>3</sup>Clinical Dept of Internal and Specialty Medicine (DAI), University Hospital (AOU), University of Campania “Luigi Vanvitelli”, Naples, Italy.

**Correspondence:** Claudio Napoli, University Dept of Advanced Medical and Surgical Sciences (DAMSS), Clinical Dept of Internal Medicine and Specialistic Units, University of Campania “Luigi Vanvitelli”, 80138 Naples, Italy. E-mail: claudio.napoli@unicampania.it

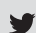

@ERSpublications

**Network medicine approaches, supporting the integrative analysis of global epigenetic changes, clinical features and environmental factors, provide new hypotheses for pathogenesis of chronic lung diseases and lead to new interventions for prevention** <https://bit.ly/3kHND9m>

**Cite this article as:** Benincasa G, DeMeo DL, Glass K, *et al.* Epigenetics and pulmonary diseases in the horizon of precision medicine: a review. *Eur Respir J* 2021; 57: 2003406 [<https://doi.org/10.1183/13993003.03406-2020>].

This single-page version can be shared freely online.

**ABSTRACT** Epigenetic mechanisms represent potential molecular routes which could bridge the gap between genetic background and environmental risk factors contributing to the pathogenesis of pulmonary diseases. In patients with COPD, asthma and pulmonary arterial hypertension (PAH), there is emerging evidence of aberrant epigenetic marks, mainly including DNA methylation and histone modifications which directly mediate reversible modifications to the DNA without affecting the genomic sequence. Post-translational events and microRNAs can be also regulated epigenetically and potentially participate in disease pathogenesis. Thus, novel pathogenic mechanisms and putative biomarkers may be detectable in peripheral blood, sputum, nasal and buccal swabs or lung tissue. Besides, DNA methylation plays an important role during the early phases of fetal development and may be impacted by environmental exposures, ultimately influencing an individual’s susceptibility to COPD, asthma and PAH later in life. With the advances in omics platforms and the application of computational biology tools, modelling the epigenetic variability in a network framework, rather than as single molecular defects, provides insights into the possible molecular pathways underlying the pathogenesis of COPD, asthma and PAH. Epigenetic modifications may have clinical applications as noninvasive biomarkers of pulmonary diseases. Moreover, combining molecular assays with network analysis of epigenomic data may aid in clarifying the multistage transition from a “pre-disease” to “disease” state, with the goal of improving primary prevention of lung diseases and its subsequent clinical management.

We describe epigenetic mechanisms known to be associated with pulmonary diseases and discuss how network analysis could improve our understanding of lung diseases.
